# Supplementary material for: Successful retrieval of competing spatial environments in humans involves hippocampal pattern separation mechanisms
Source: eLife journal article supplement (doi:10.7554/elife.10499), 2015-11-27
Supplement: supp [file elife-10499-supp-v1.zip]

Archive with 7 entries (7 files):
- elife_poa_e10499_Figure_1_figure_supplement_1.pdf
- elife_poa_e10499_Figure_5_figure_supplement_2.pdf
- elife_poa_e10499_Figure_3_figure_supplement_1.pdf
- elife_poa_e10499_Figure_5_figure_supplement_1.pdf
- elife_poa_e10499_Figure_4_figure_supplement_1.pdf
- elife_poa_e10499_Figure_2_figure_supplement_1.png
- elife_poa_e10499_Figure_3_figure_supplement_2.pdf
