# Supplementary material for: Successful retrieval of competing spatial environments in humans involves hippocampal pattern separation mechanisms
Source: eLife journal article supplement (doi:10.7554/elife.10499), 2015-11-27

A.

14 voxels

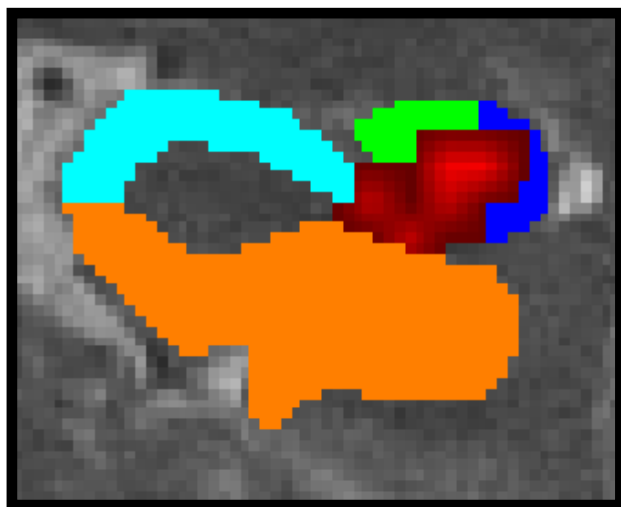

B.

Cluster Makeup:

Left  
CA1Left  
ECLeft  
PHCLeft  
SUBLeft  
CA3/DG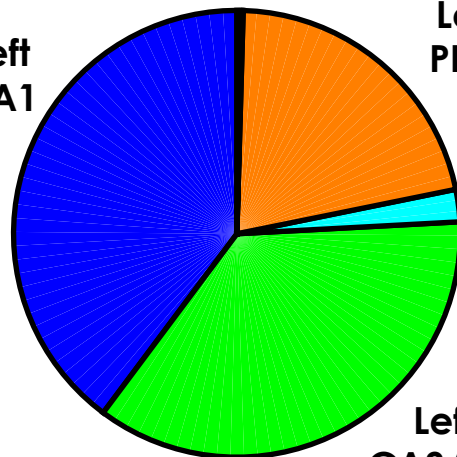

C.

Classifier Performance

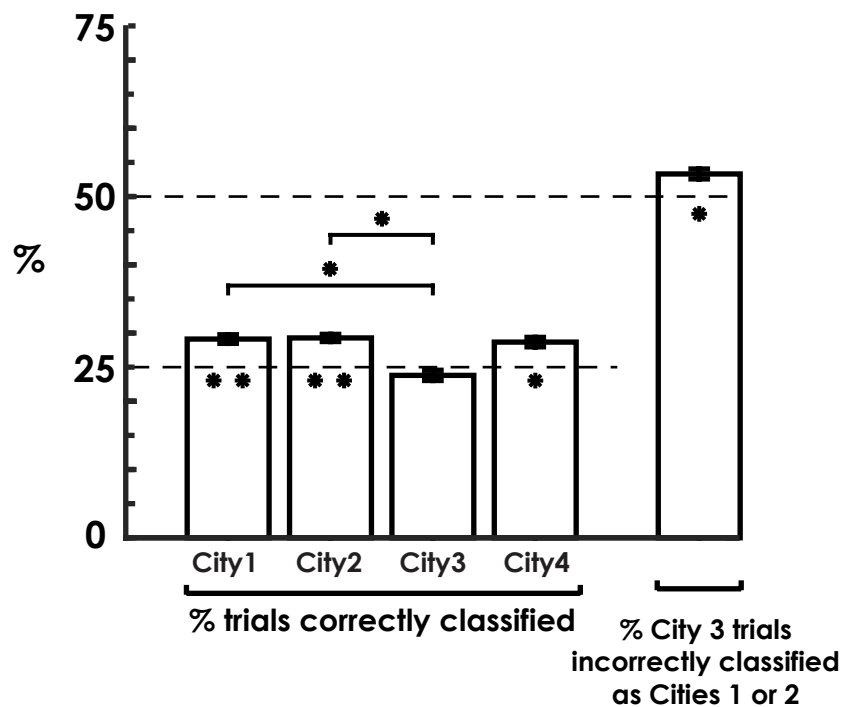

D.

City 3

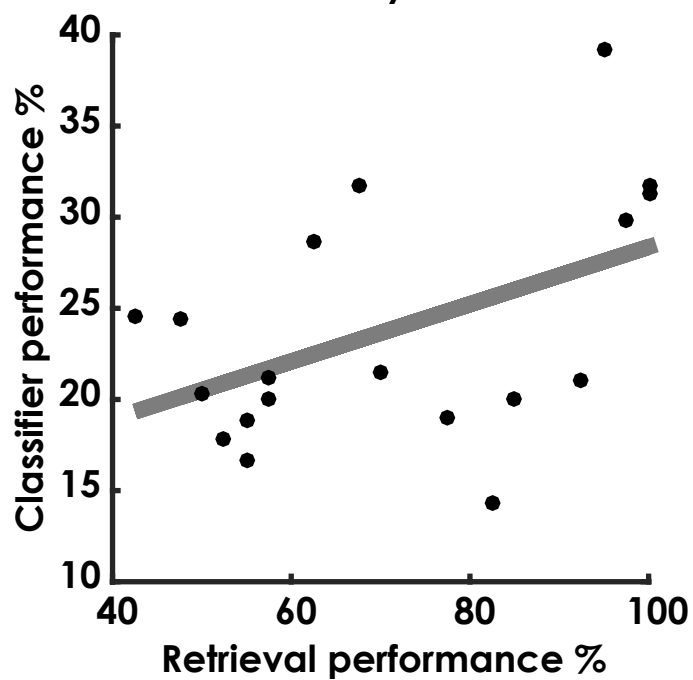

Supplement: supp [file elife-10499-supp-v1.zip › elife_poa_e10499_Figure_3_figure_supplement_1.pdf]
