# Supplementary material for: Successful retrieval of competing spatial environments in humans involves hippocampal pattern separation mechanisms
Source: eLife journal article supplement (doi:10.7554/elife.10499), 2015-11-27

A.

## Left PHC

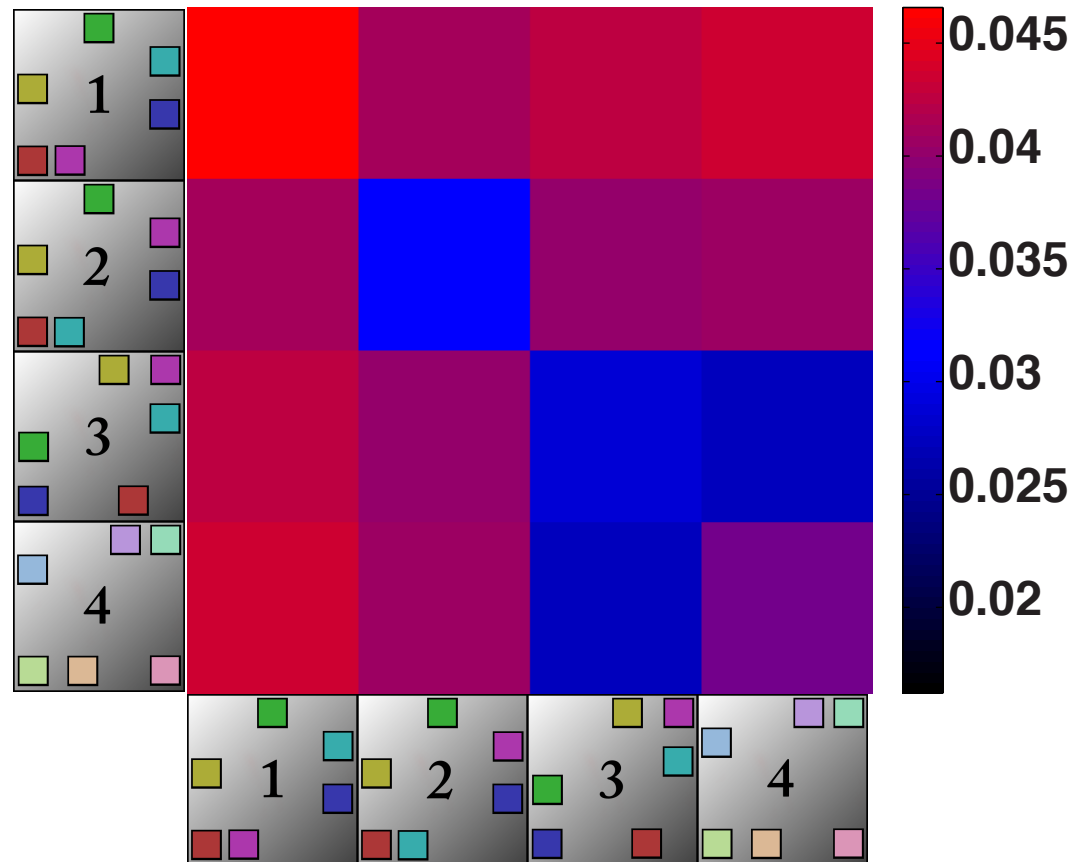

B.

## Right PHC

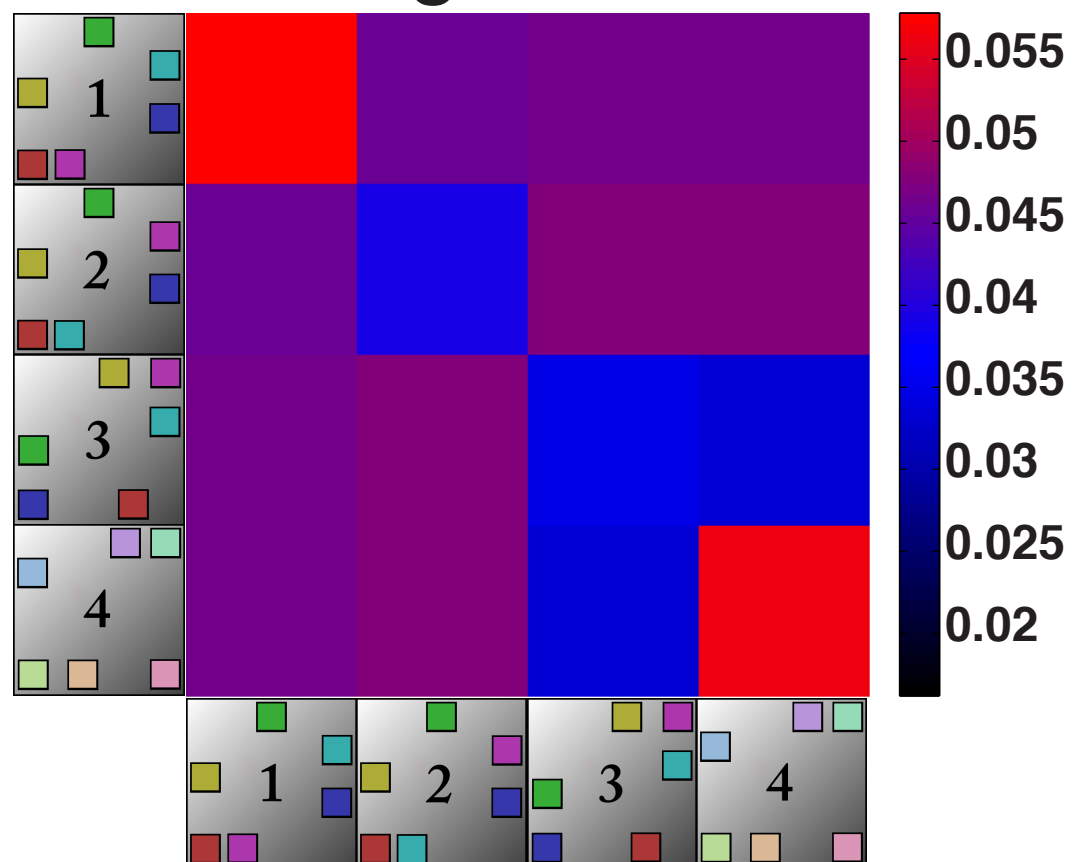

C.

Legend:

$r$   
Incorrect City 3  
vs  
Correct City 1or2

$r$   
Correct City 3  
vs  
Correct City 1&2

## Left PHC

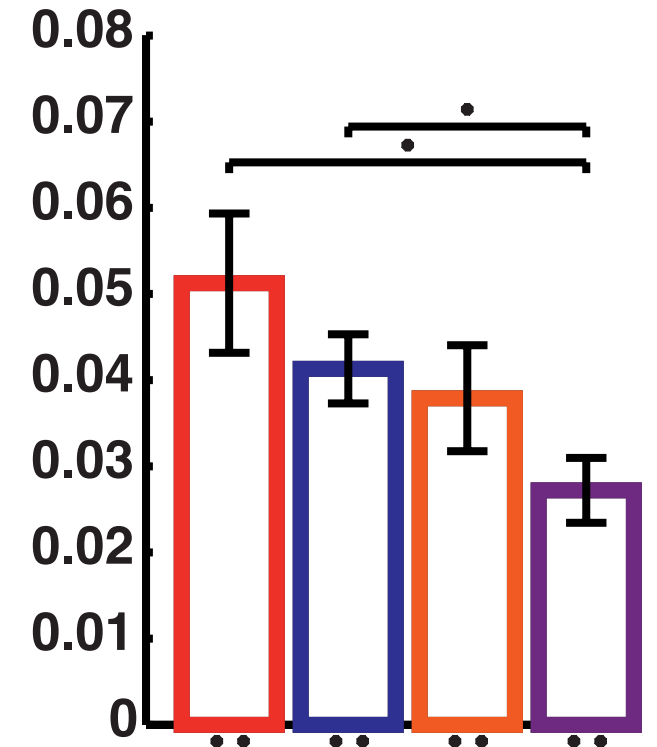

## Right PHC

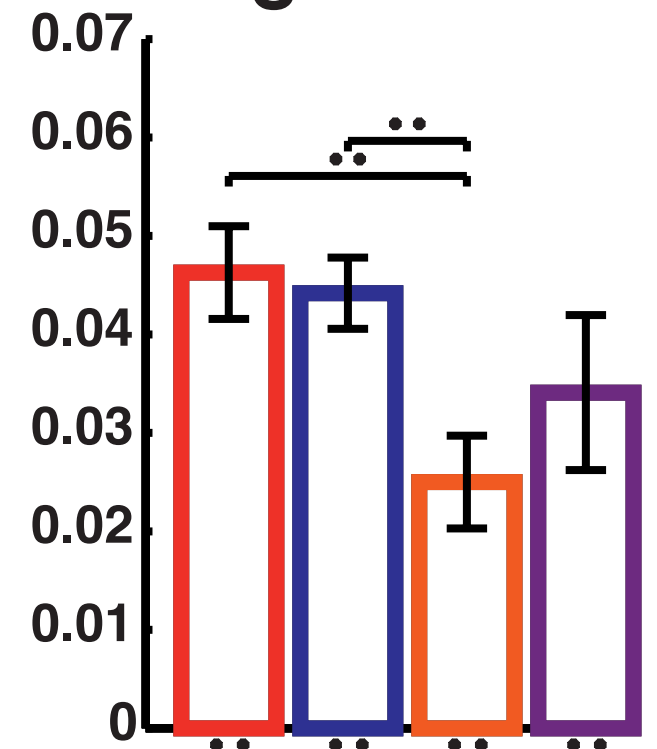

Supplement: supp [file elife-10499-supp-v1.zip › elife_poa_e10499_Figure_4_figure_supplement_1.pdf]
