# Supplementary figures and images for: Successful retrieval of competing spatial environments in humans involves hippocampal pattern separation mechanisms
Source: eLife journal article supplement (doi:10.7554/elife.10499), 2015-11-27

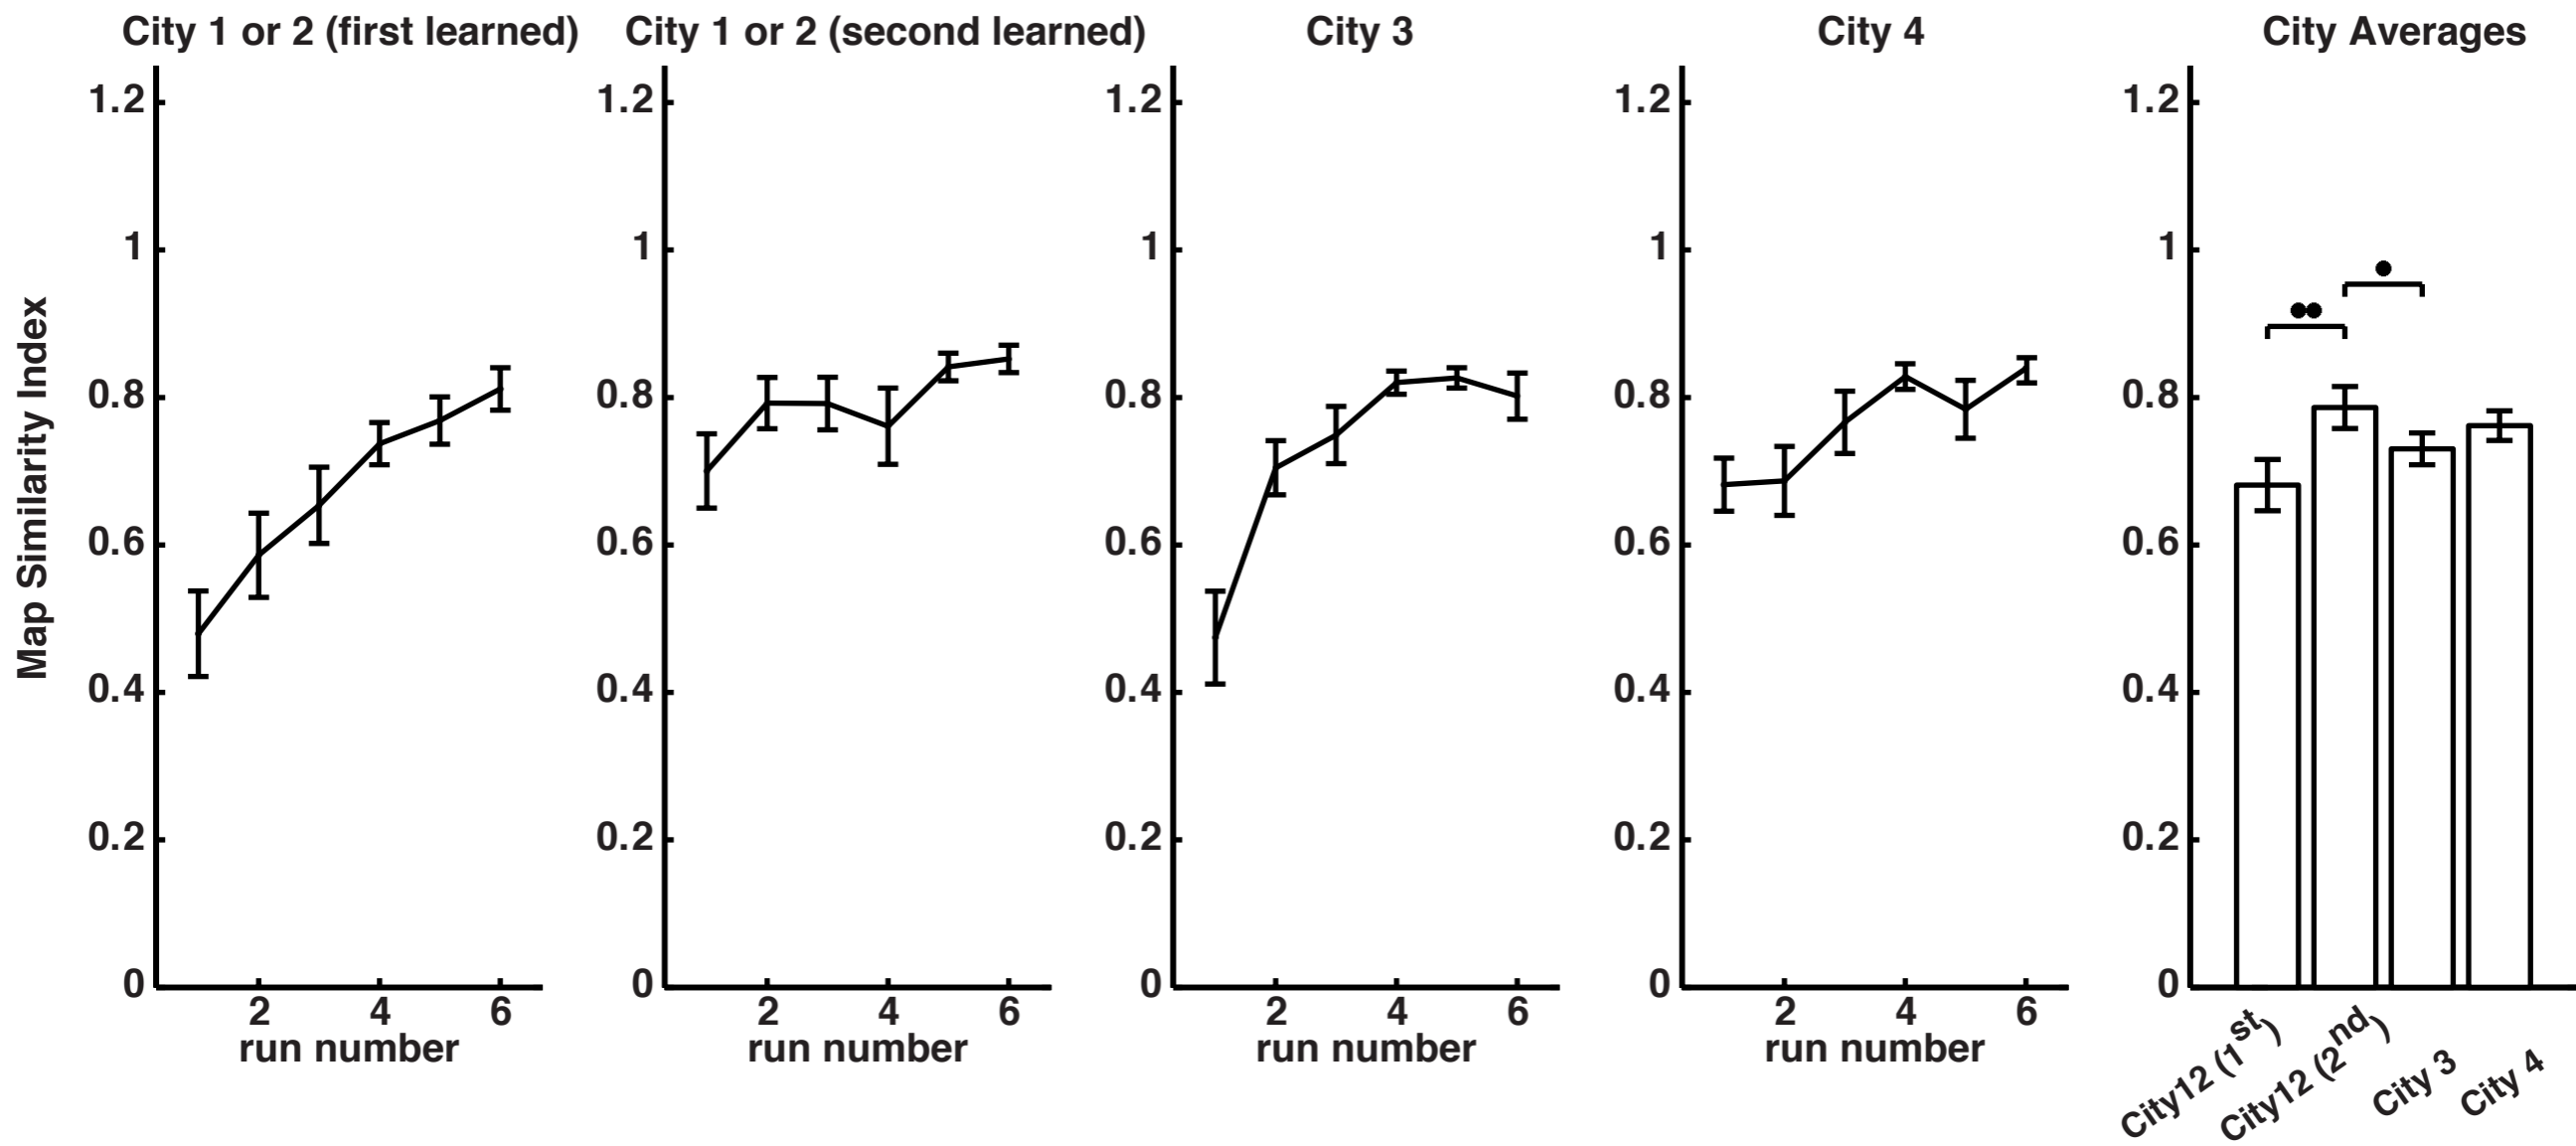

Supplement: supp [file elife-10499-supp-v1.zip › elife_poa_e10499_Figure_1_figure_supplement_1.pdf]

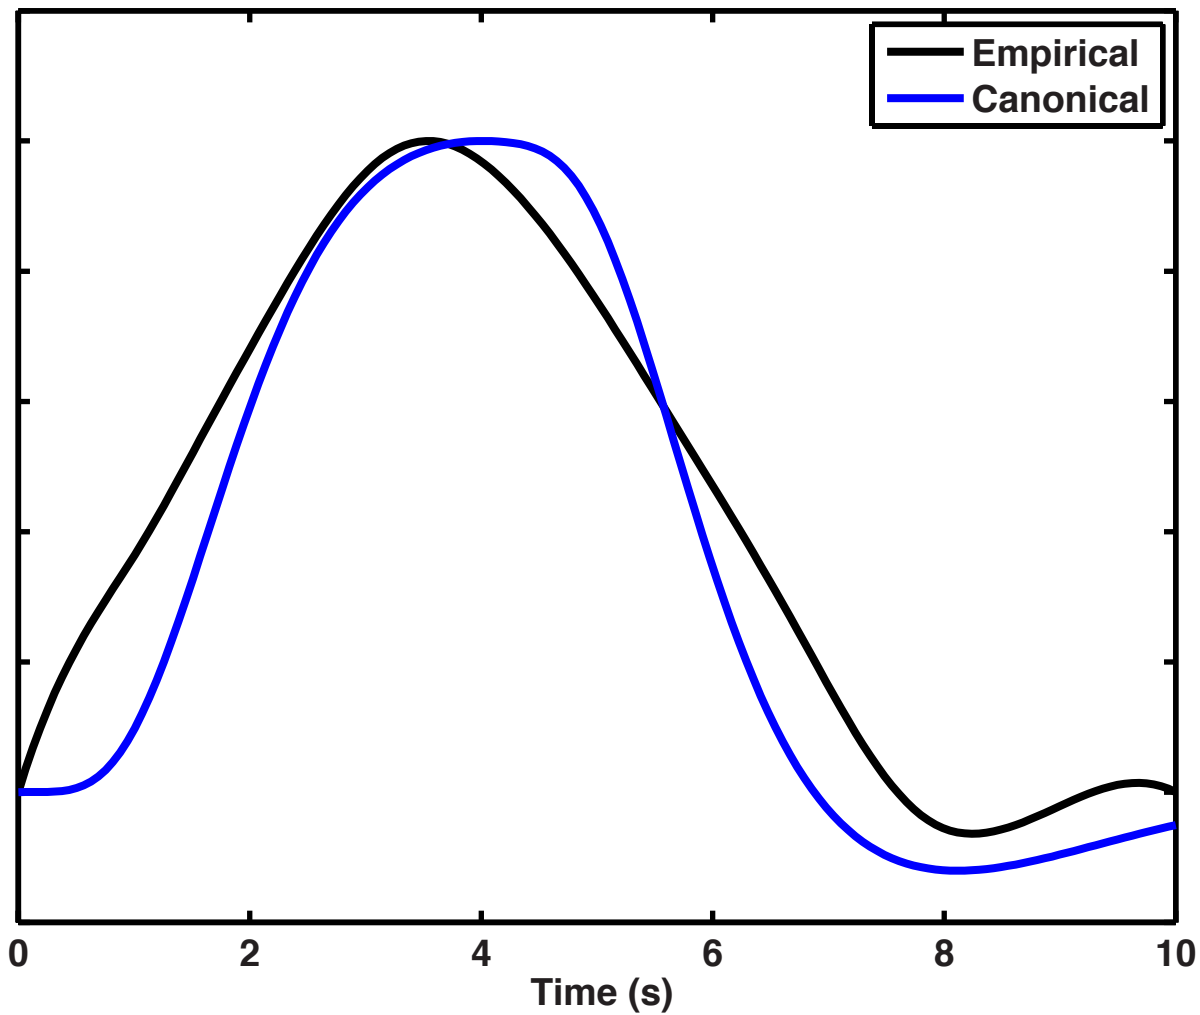

Supplement: supp [file elife-10499-supp-v1.zip › elife_poa_e10499_Figure_5_figure_supplement_2.pdf]

# A. Right CA3/DG

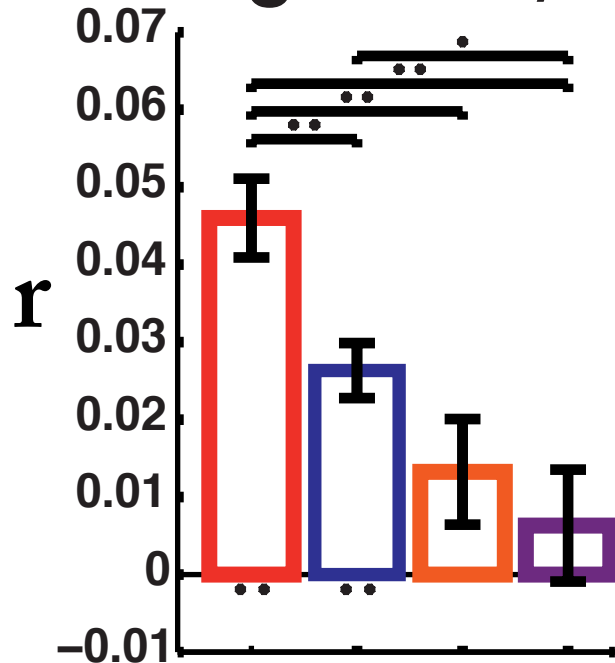

# B. Right CA1

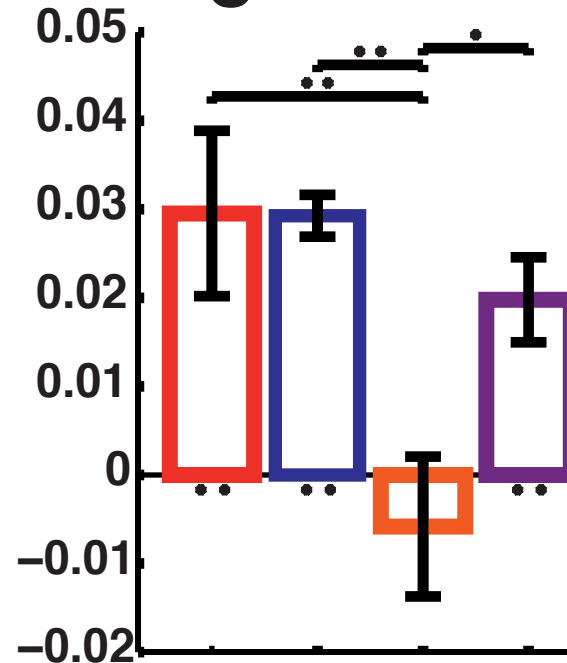

## Legend:

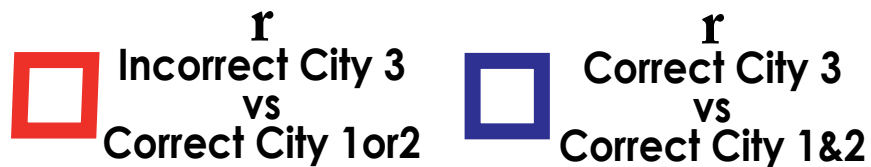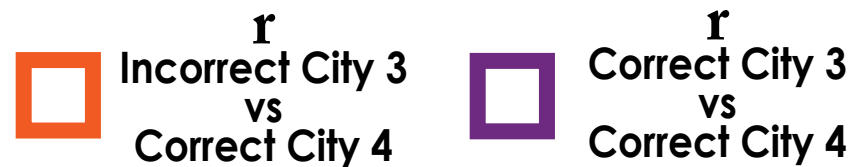

Supplement: supp [file elife-10499-supp-v1.zip › elife_poa_e10499_Figure_5_figure_supplement_1.pdf]

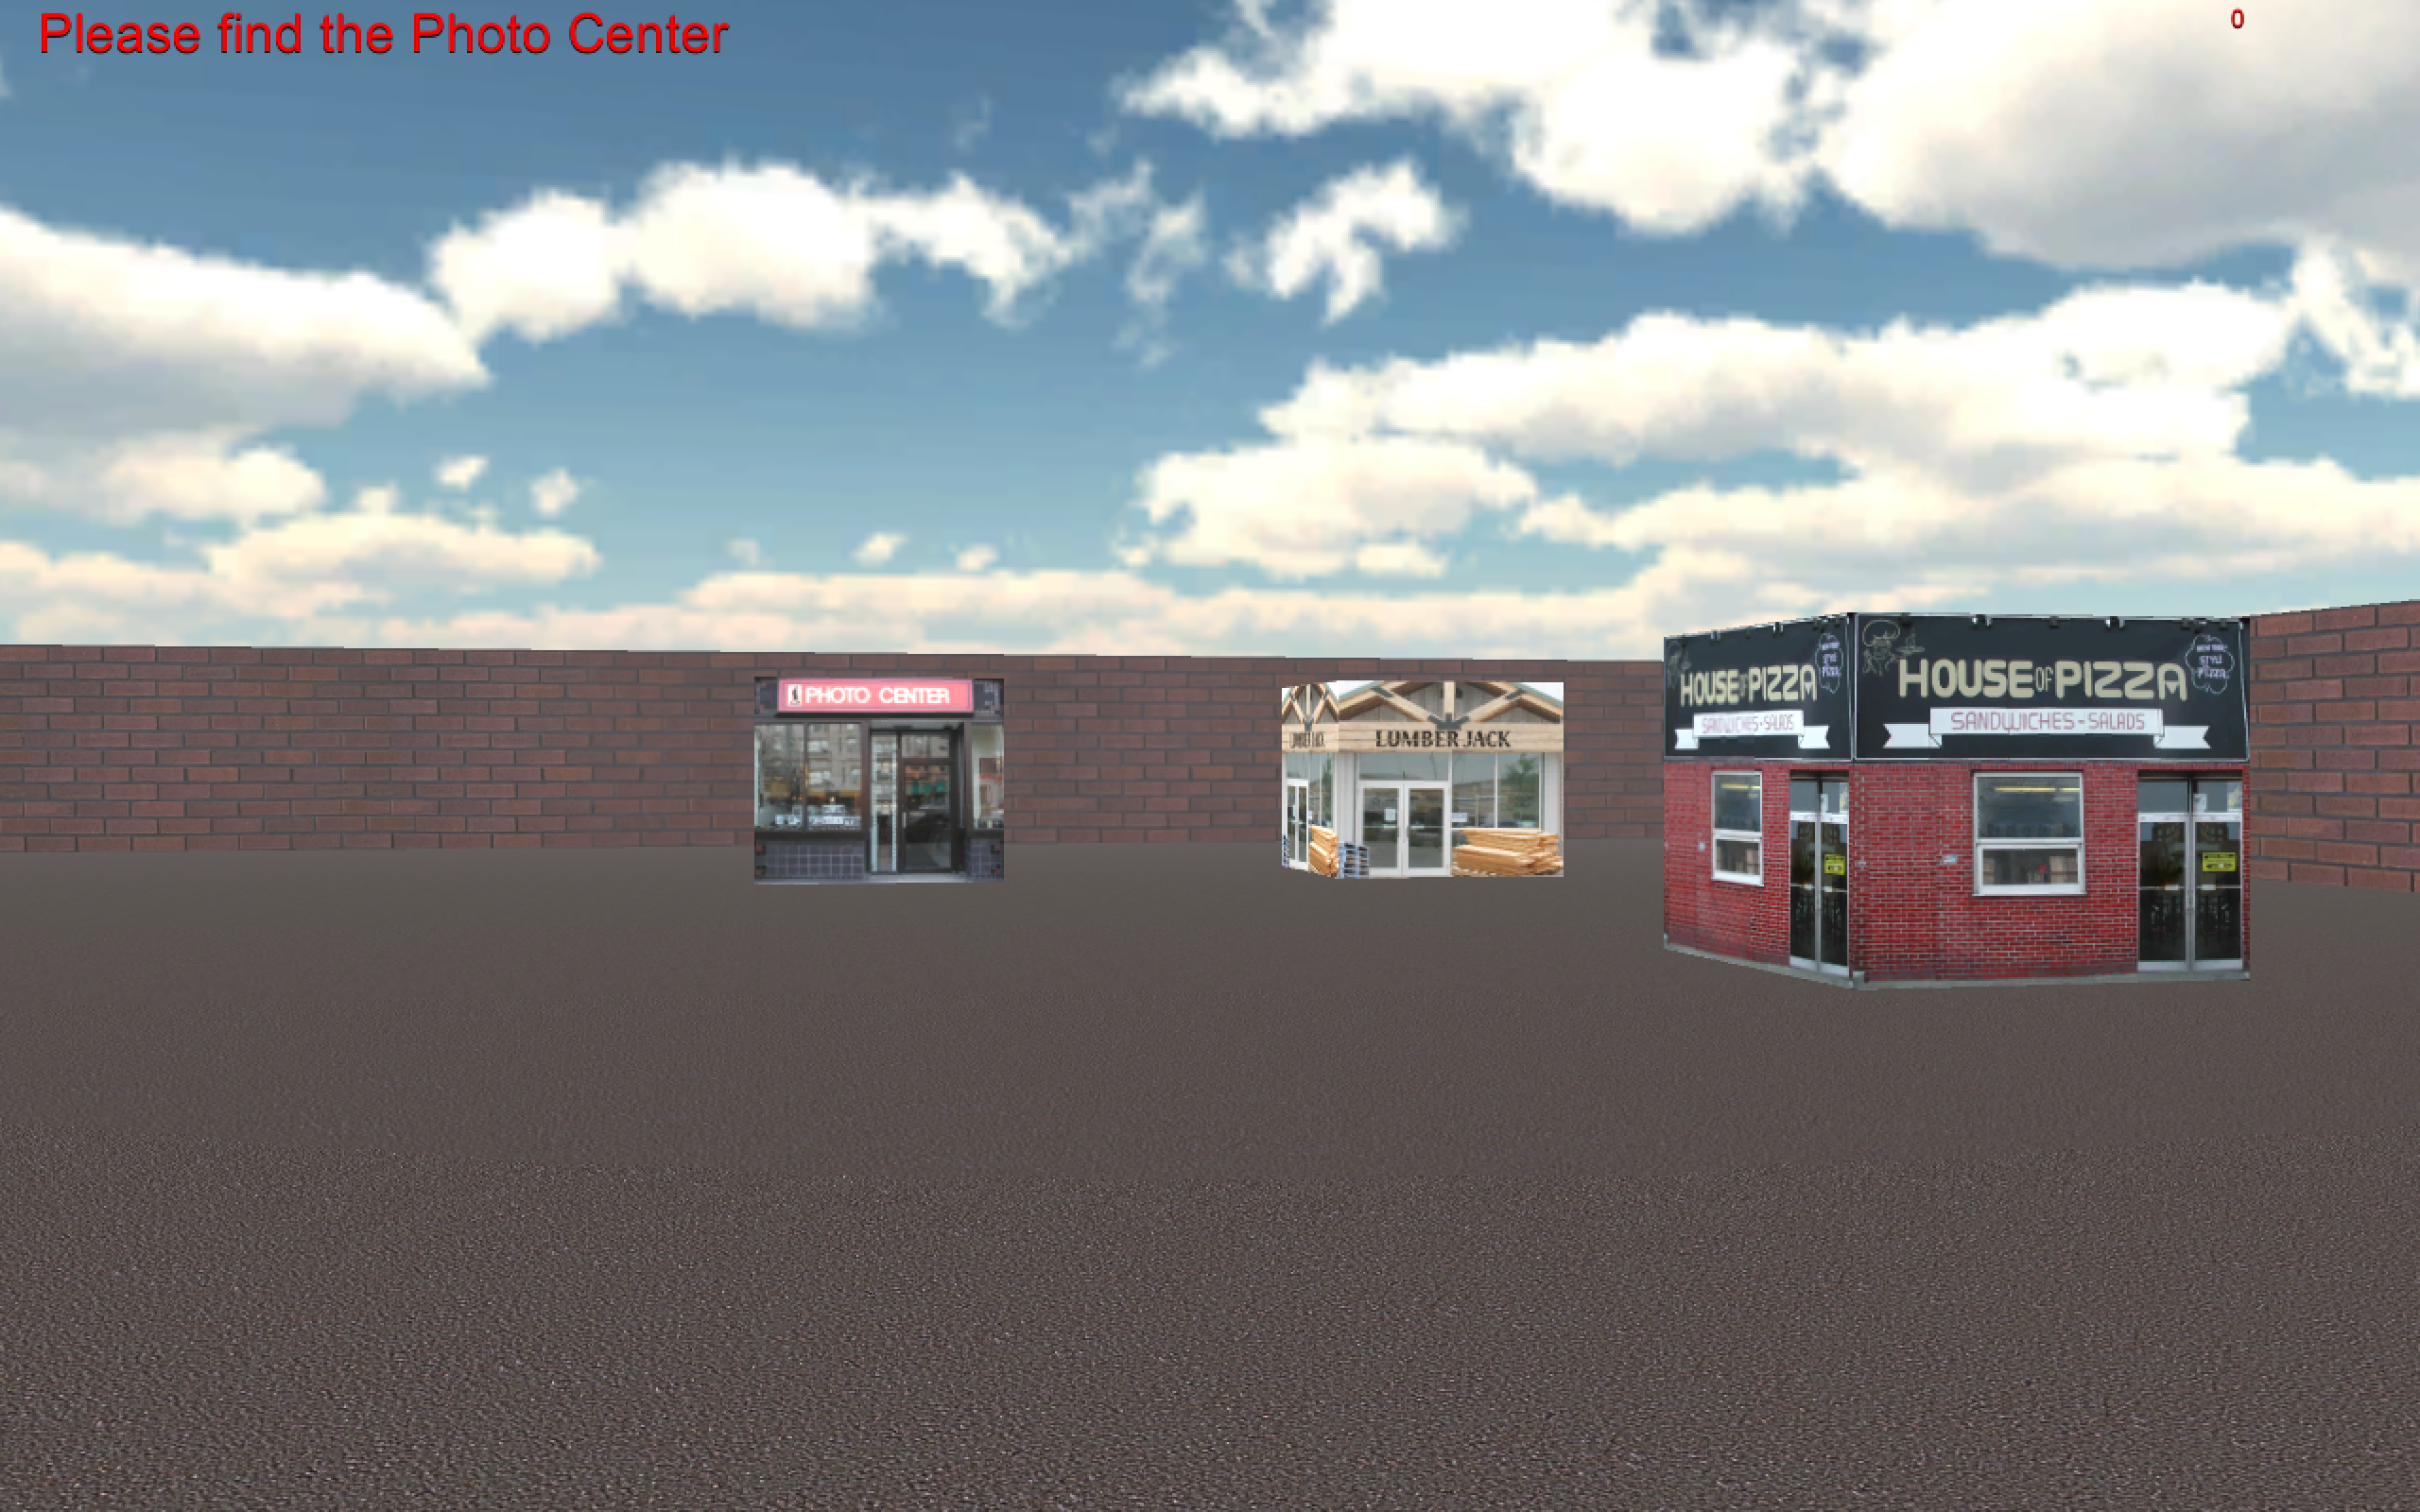

Supplement: supp [file elife-10499-supp-v1.zip › elife_poa_e10499_Figure_2_figure_supplement_1.png]

# City 1 & 2 classification results

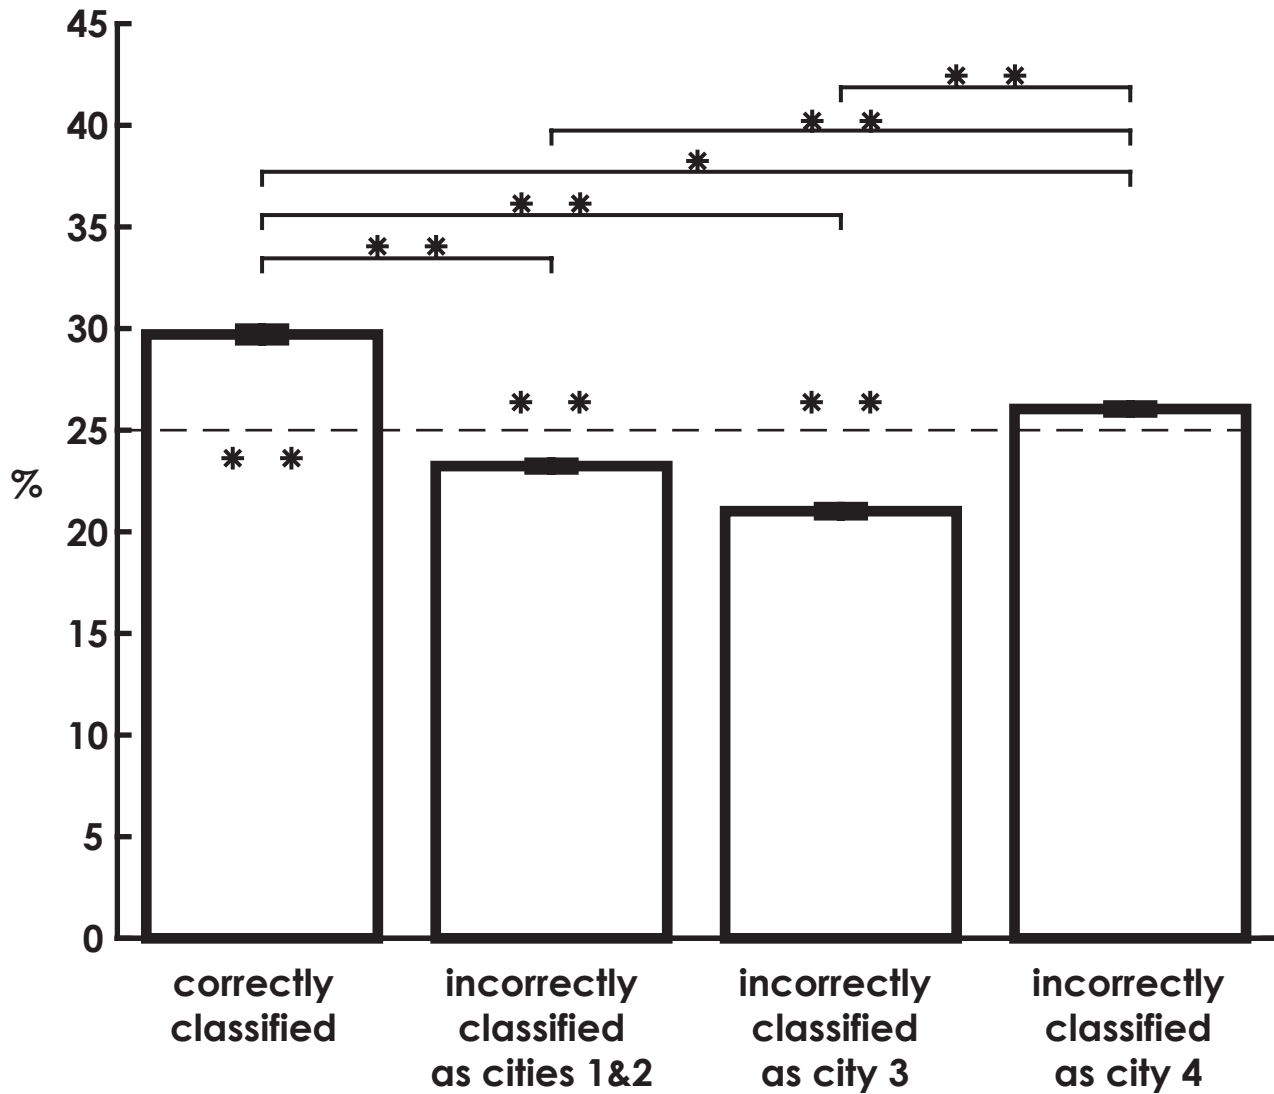

Supplement: supp [file elife-10499-supp-v1.zip › elife_poa_e10499_Figure_3_figure_supplement_2.pdf]
